# Supplementary material for: Clinical characteristics and risk factors associated with severe COVID-19: prospective analysis of 1,045 hospitalised cases in North-Eastern France, March 2020
Source: PubMed Central journal article supplement (PMC7716399; doi:10.2807/1560-7917.es.2020.25.48.2000895), 2020-12-03

## SUPPLEMENTARY MATERIAL

This supplementary material is hosted by *Eurosurveillance* as supporting information alongside the article “Clinical characteristics and risk factors associated with severe COVID-19: prospective analysis of 1,045 hospitalised cases in North-Eastern France, March 2020”, on behalf of the authors, who remain responsible for the accuracy and appropriateness of the content. The same standards for ethics, copyright, attributions and permissions as for the article apply. Supplements are not edited by *Eurosurveillance* and the journal is not responsible for the maintenance of any links or email addresses provided therein.

**Supplementary Table 1. Demographic and Biological Characteristics according to Body Mass Index**

|                                             | BMI, kg/m <sup>2</sup> |      |                  |      |              |      |
|---------------------------------------------|------------------------|------|------------------|------|--------------|------|
|                                             | <25<br>n=236           |      | 25-29.9<br>n=310 |      | ≥30<br>n=351 |      |
|                                             | n                      | %    | n                | %    | n            | %    |
| Age, years, mean (SD)                       | 71.2 (17.0)            |      | 65.5 (15.3)      |      | 64.0 (14.9)  |      |
| Male sex                                    | 126                    | 53.4 | 209              | 67.4 | 200          | 57.0 |
| Comorbidity                                 |                        |      |                  |      |              |      |
| Hypertension                                | 131                    | 55.5 | 144              | 46.5 | 213          | 60.7 |
| Diabetes                                    | 40                     | 16.9 | 78               | 25.2 | 120          | 34.2 |
| Chronic heart failure                       | 37                     | 15.7 | 30               | 9.7  | 46           | 13.1 |
| Chronic respiratory disease                 | 38                     | 16.1 | 45               | 14.5 | 73           | 20.8 |
| Chronic kidney disease                      | 29                     | 12.3 | 38               | 12.3 | 43           | 12.3 |
| Chronic hepatic failure                     | 3                      | 1.3  | 5                | 1.6  | 3            | 0.9  |
| Immunosuppression                           | 20                     | 8.5  | 14               | 4.5  | 8            | 2.3  |
| Cancer <sup>a</sup>                         | 30                     | 12.7 | 33               | 10.6 | 33           | 9.4  |
| Haematological malignancy <sup>a</sup>      | 8                      | 3.4  | 11               | 3.5  | 10           | 2.8  |
| Biological markers                          |                        |      |                  |      |              |      |
| CRP 100–199 mg/L                            | 59                     | 25   | 99               | 31.9 | 108          | 30.8 |
| CRP ≥200 mg/L                               | 21                     | 8.9  | 50               | 16.1 | 46           | 13.1 |
| Neutrophil count ≥8,000 per μL <sup>b</sup> | 45                     | 20.1 | 62               | 20.6 | 62           | 18.0 |
| Lymphocytes <1,000 per μL <sup>c</sup>      | 159                    | 71.0 | 200              | 66.2 | 177          | 51.2 |
| AST ≥2N <sup>d</sup>                        | 34                     | 19.8 | 69               | 26.2 | 87           | 29.1 |
| Creatinine ≥133 μmol/L <sup>e</sup>         | 32                     | 14.2 | 44               | 14.5 | 62           | 17.8 |

Abbreviations: AST, aspartate aminotransferase; BMI, body mass index; CRP, C-reactive protein; 2N, twice the upper limit of normal value (Norm: 11-34).

<sup>a</sup>Active or in remission; <sup>b</sup>Data available for 870 patients; <sup>c</sup>Data available for 872 patients; <sup>d</sup>Data available for 734 patients; <sup>e</sup>Data available for 878 patients.

**Supplementary Table 2. Biological and Radiologic Findings at Admission**

|                                                            | norm        | All patients<br>n=1,045 |      | Non severe<br>disease<br>n=621 |      | Severe<br>disease<br>n=424 |      | Diff. in proportion<br>of the event [CrI] | Pr<br>diff>0     |
|------------------------------------------------------------|-------------|-------------------------|------|--------------------------------|------|----------------------------|------|-------------------------------------------|------------------|
|                                                            |             | n                       | %    | n                              | %    | n                          | %    |                                           |                  |
| <b>Biological findings</b>                                 |             |                         |      |                                |      |                            |      |                                           |                  |
| Neutrophil count $\geq 8,000$ per $\mu\text{L}^{\text{a}}$ | 1,800–7,900 | 192                     | 19.0 | 73                             | 12.2 | 119                        | 28.7 | -18.1 [-24.5;-11.5]                       | <b>&lt;0.001</b> |
| Lymphocyte count <sup>b</sup> <1,000 per $\mu\text{L}$     | 1,000–4,000 | 618                     | 60.9 | 334                            | 55.9 | 284                        | 68.3 | 10.5 [4.9;16.0]                           | <b>0.990</b>     |
| Haemoglobin <sup>c</sup> <10 g/dL                          | 12–16       | 66                      | 6.5  | 42                             | 7.0  | 24                         | 5.7  | -2.9 [-10.8;5.2]                          | 0.232            |
| Platelet count <sup>c</sup> <100 per $\mu\text{L}$         | 150–400     | 61                      | 6.0  | 35                             | 5.9  | 26                         | 6.2  | -0.2 [-8.2;8.1]                           | 0.483            |
| <b>C-reactive protein<sup>d</sup></b>                      |             |                         |      |                                |      |                            |      |                                           |                  |
| <100 mg/L                                                  | <4          | 550                     | 55.3 | 400                            | 67.6 | 150                        | 37.2 | [Reference]                               |                  |
| 100–199 mg/L                                               | <4          | 308                     | 31.0 | 155                            | 26.2 | 153                        | 38.0 | -18.1 [-24.0;-12.1]                       | <b>&lt;0.001</b> |
| $\geq 200$ mg/L                                            | <4          | 137                     | 13.8 | 37                             | 6.3  | 100                        | 24.8 | -29.8 [-36.8;-22.6]                       | <b>&lt;0.001</b> |
| AST>2N <sup>e</sup>                                        | 11–34       | 211                     | 24.7 | 76                             | 19.6 | 135                        | 34.7 | -0.2 [-0.23;-0.10]                        | <b>&lt;0.001</b> |
| Serum creatinine <sup>c</sup> $\geq 133$ $\mu\text{mol/L}$ | 49–90       | 147                     | 14.4 | 66                             | 11.1 | 81                         | 19.2 | -9.8 [-16.7;-3.0]                         | <b>0.002</b>     |
| Lactate <sup>h</sup> $\geq 2$ mmol/L                       | 0.5–1.6     | 78                      | 12.6 | 21                             | 7.7  | 57                         | 16.5 | -3.2 [-11.4;5.0]                          | 0.227            |
| <b>Chest CT scan findings</b>                              |             |                         |      |                                |      |                            |      |                                           |                  |
| Compatible lesions with COVID-19 <sup>i</sup>              |             | 616                     | 89.7 | 383                            | 87.2 | 233                        | 94   | -6.0 [-13.6;2.0]                          | 0.070            |

Probabilities near 1 or 0 are both suggestive of an effect, respectively of a positive or negative difference, and are marked in bold.

Abbreviation: AST, aspartate aminotransferase; CrI, credible interval; CT, computed tomography; Diff., difference; 2N, twice the upper limit of normal value; Pr, probability; SD, standard deviation.

<sup>a</sup>Data available for 1012 patients; <sup>b</sup>Data available for 1014 patients; <sup>c</sup>Data available for 1019 patients; <sup>d</sup>Data available for 995 patients; <sup>e</sup>Data available for 853 patients; <sup>f</sup>Data available for 856 patients; <sup>g</sup>Data available for 1013 patients; <sup>h</sup>Data available for 619 patients; <sup>i</sup>Data available for 687 patients. Compatible lesions are defined by ground glass opacities with a peripheral distribution.

**Supplementary figure 1. Survival analysis depending of the eight-category ordinal scale within the first day of admission**

(A) Classification of the patients according to the eight-category ordinal scale

(B) Event-free survival (no ICU admission or death)

(C) Survival (no death)

**A**

| Eight-category ordinal scale at admission                                                         | Number of patients |
|---------------------------------------------------------------------------------------------------|--------------------|
| 1: Not hospitalised without limitations of activities                                             | 0                  |
| 2: Not hospitalised, limitation of activities, home oxygen requirement, or both                   | 0                  |
| 3: Hospitalised, not requiring oxygen and no longer requiring ongoing medical care                | 0                  |
| 4: Hospitalised, not requiring supplemental oxygen but requiring ongoing medical care             | 271                |
| 5: Hospitalised, requiring any supplemental oxygen                                                | 588                |
| 6: Hospitalised, requiring non-invasive ventilation or use of high-flow oxygen devices            | 0                  |
| 7: Hospitalised, receiving invasive mechanical ventilation or extracorporeal membrane oxygenation | 181                |
| 8 : Death                                                                                         | 5                  |

**B**

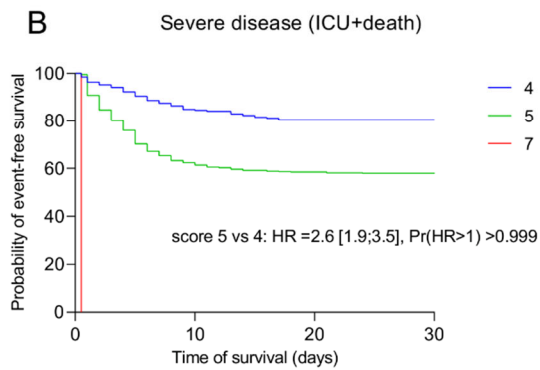

**C**

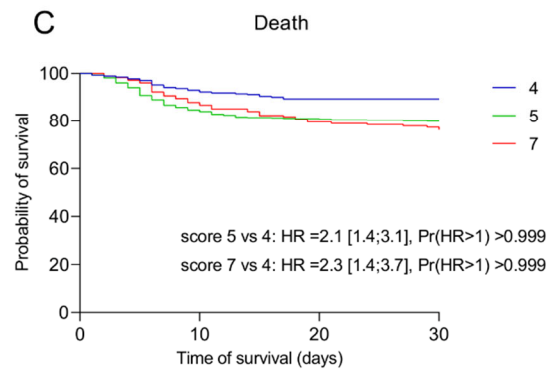

Supplement: 2000895_Supplement.pdf [file 2000895_Supplement.pdf]
